# Supplementary material for: Determinants of Plasma 25-Hydroxyvitamin D Concentrations among Breast Cancer Survivors in Korea
Source: MDPI journal article supplement (doi:10.3390/nu10030380), 2018-03-20
Supplement: s1 [file s1]

**Table S1.** Characteristics of study participants according to centre.

| Variables                                             | All ( <i>n</i> = 219)     | Centre                    |                           |                           |
|-------------------------------------------------------|---------------------------|---------------------------|---------------------------|---------------------------|
|                                                       |                           | 1 ( <i>n</i> = 79)        | 2 ( <i>n</i> = 70)        | 3 ( <i>n</i> = 70)        |
| Plasma 25(OH)D (nmol/L)                               | 50.77 (29.30–75.48)       | 67.59 (51.94–81.24)       | 37.46 (28.73–62.57)       | 32.85 (21.74–55.61)       |
| Age at diagnosis (years)                              | 48.00 (43.00–53.00)       | 49.00 (45.00–53.00)       | 47.00 (44.00–53.00)       | 46.50 (41.00–52.00)       |
| Body mass index at the diagnosis (kg/m <sup>2</sup> ) | 23.37 (21.63–25.74)       | 23.22 (21.66–25.71)       | 22.59 (21.36–25.67)       | 23.94 (21.74–25.79)       |
| Energy intake (kcal/day)                              | 1695.25 (1410.58–2039.44) | 1742.43 (1395.87–2052.45) | 1667.10 (1372.56–1927.59) | 1693.48 (1417.25–2078.25) |
| Physical activity (MET hours per week)                | 49.95 (11.70–49.95)       | 29.00 (0.00–56.20)        | 30.12 (16.57–52.00)       | 21.75 (9.33–39.75)        |
| Total vitamin D intake (µg/day)                       | 5.01 (0.06–15.56)         | 12.66 (12.21–27.63)       | 3.41 (0.00–12.21)         | 2.62 (0.00–7.24)          |
| Supplementary vitamin D intake (µg/day)               | 2.5 (0.00–10.00)          | 10.00 (0.00–25.00)        | 0.00 (0.00–10.00)         | 0.00 (0.00–10.00)         |
| Dietary supplement use                                |                           |                           |                           |                           |
| Yes                                                   | 156 (71.23)               | 67 (84.81)                | 44 (62.86)                | 45 (64.29)                |
| No                                                    | 57 (26.03)                | 11 (13.92)                | 24 (34.29)                | 22 (31.43)                |
| Time since surgery                                    |                           |                           |                           |                           |
| 6 month–<1 year                                       | 2 (0.91)                  | 1 (1.27)                  | 1 (1.43)                  | 0                         |
| 1 year–<3 years                                       | 144 (65.75)               | 49 (62.03)                | 61 (87.14)                | 34 (48.57)                |
| 3 years–<5years                                       | 35 (15.98)                | 16 (20.25)                | 8 (11.43)                 | 11 (15.71)                |
| 5 years and more                                      | 38 (17.35)                | 13 (16.46)                | 0                         | 25 (35.71)                |
| AJCC <sup>a</sup> stage                               |                           |                           |                           |                           |
| I                                                     | 102 (46.58)               | 27 (34.18)                | 46 (65.71)                | 29 (41.43)                |
| II                                                    | 86 (39.27)                | 38 (48.10)                | 17 (24.29)                | 31 (44.29)                |
| III                                                   | 31 (14.16)                | 14 (17.72)                | 7 (10.00)                 | 10 (14.29)                |
| Season of the blood draw                              |                           |                           |                           |                           |
| Spring                                                | 48 (21.92)                | 25 (31.65)                | 0                         | 23 (32.86)                |
| Summer                                                | 64 (29.22)                | 11 (13.92)                | 52 (74.29)                | 1 (1.43)                  |
| Fall                                                  | 58 (26.48)                | 29 (36.71)                | 18 (25.71)                | 11 (15.71)                |

|                                    |             |            |            |            |
|------------------------------------|-------------|------------|------------|------------|
| winter                             | 49 (22.37)  | 14 (17.72) | 0          | 35 (50.00) |
| Menopausal status at the diagnosis |             |            |            |            |
| Yes                                | 151 (68.95) | 53 (67.09) | 47 (67.14) | 51 (72.86) |
| No                                 | 68 (31.05)  | 26 (32.91) | 23 (32.86) | 19 (27.14) |
| Alcohol intake                     |             |            |            |            |
| Never                              | 94 (43.32)  | 28 (36.36) | 35 (50.00) | 31 (44.29) |
| Ever                               | 123 (56.68) | 49 (63.64) | 35 (50.00) | 39 (55.71) |
| Smoking status                     |             |            |            |            |
| Never                              | 175 (79.91) | 52 (65.82) | 64 (91.43) | 59 (84.29) |
| Former <sup>b</sup>                | 22 (10.05)  | 15 (18.99) | 2 (2.86)   | 5 (7.14)   |
| Education level                    |             |            |            |            |
| High school or less                | 149 (68.35) | 57 (72.15) | 48 (68.57) | 44 (63.77) |
| College or more                    | 69 (31.65)  | 22 (27.85) | 22 (31.43) | 25 (36.23) |
| Marital status                     |             |            |            |            |
| Married or cohabitation            | 172 (79.26) | 64 (82.05) | 58 (82.86) | 50 (72.46) |
| Unmarried or divorced or widowed   | 45 (20.74)  | 14 (17.95) | 12 (17.14) | 19 (27.54) |
| Parity number                      |             |            |            |            |
| None                               | 37 (16.89)  | 3 (3.80)   | 4 (5.71)   | 3 (4.29)   |
| 1                                  | 128 (58.45) | 16 (20.25) | 9 (12.86)  | 12 (17.14) |
| 2                                  | 42 (19.18)  | 46 (58.23) | 41 (58.57) | 41 (58.57) |
| 3 and more                         | 10 (4.57)   | 13 (16.46) | 16 (22.86) | 13 (18.57) |

Continuous variables are reported as median value (interquartile range) and categorical variables are reported as number of participants. (%); <sup>a</sup>AJCC: American Joint Committee on Cancer; <sup>b</sup>Only past smoker was included because no one smoked at enrollment.

**Table S2.** Odds ratio (OR) and 95% confidence interval (CI) for the association between factors and plasma 25(OH)D status (< 50 nmol/ml) among breast cancer survivors.

| Variables <sup>a</sup>                         | Number of case/total | OR (95% CI)         |
|------------------------------------------------|----------------------|---------------------|
| Age (per 1 year)                               | 107/219              | 0.96 (0.88 , 1.04)  |
| Time since diagnosis (per 1 moth)              | 107/219              | 1.03 (1.01 , 1.05)  |
| Total energy intake (per 1 kcal/day)           | 107/219              | 1.00 (1.00 , 1.00)  |
| Supplementary vitamin D intake (per 10 µg/day) | 107/219              | 0.53 (0.25 , 1.12)  |
| Supplementary calcium intake (per 10 mg/day)   | 107/219              | 1.00 (0.97 , 1.03)  |
| Body mass index                                | 107/219              | 1.20 (1.03 , 1.39)  |
| Physical activity (per 1 met-hours/day)        | 107/219              | 1.00 (0.99 , 1.01)  |
| Daily sun exposure (per 1 minutes/day)         | 107/219              | 1.00 (1.00 , 1.00)  |
| Season                                         |                      |                     |
| Spring (referent)                              | 28/48                | 1.00                |
| Summer                                         | 32/64                | 0.21 (0.04 , 1.12)  |
| Fall                                           | 24/58                | 0.29 (0.08 , 1.12)  |
| winter                                         | 23/49                | 0.40 (0.11 , 1.50)  |
| Smoking status                                 |                      |                     |
| Never (referent)                               | 91/175               | 1.00                |
| Former <sup>b</sup>                            | 3/22                 | 0.08 (0.01 , 0.52)  |
| Alcohol intake                                 |                      |                     |
| Never drinker (referent)                       | 56/124               | 1.00                |
| Ever drinker                                   | 51/92                | 1.10 (0.47 , 2.60)  |
| Supplement use                                 |                      |                     |
| Yes (referent)                                 | 62/156               | 1.00                |
| No                                             | 42/57                | 4.05 (1.41 , 11.62) |
| Postmenopausal status                          |                      |                     |
| Yes (referent)                                 | 72/151               | 1.00                |
| No                                             | 35/68                | 1.92 (0.61 , 6.01)  |

|                                                                                                             |        |                     |
|-------------------------------------------------------------------------------------------------------------|--------|---------------------|
| Radiation therapy                                                                                           |        |                     |
| Yes (referent)                                                                                              | 86/166 | 1.00                |
| No                                                                                                          | 21/50  | 1.23 (0.46 , 3.28)  |
| Chemo therapy                                                                                               |        |                     |
| Yes (referent)                                                                                              | 83/175 | 1.00                |
| No                                                                                                          | 24/41  | 0.86 (0.30 , 2.45)  |
| Hormone therapy                                                                                             |        |                     |
| Yes (referent)                                                                                              | 76/166 | 1.00                |
| No                                                                                                          | 29/50  | 0.27 (0.02 , 4.81)  |
| ER status                                                                                                   |        |                     |
| (+) (referent)                                                                                              | 76/165 | 1.00                |
| (-)                                                                                                         | 31/54  | 3.73 (0.20 , 68.22) |
| Eye color                                                                                                   |        |                     |
| Light brown                                                                                                 | 14/31  | 0.88 (0.23 , 3.41)  |
| Dark brown                                                                                                  | 43/93  | 1.28 (0.49 , 3.37)  |
| Black (referent)                                                                                            | 45/83  | 1.00                |
| Skin change during an hour in the summer sun without sunscreen after several months of not being in the sun |        |                     |
| Blistering sunburn                                                                                          | 4/11   | 0.57 (0.08 , 4.26)  |
| Sunburn without blisters                                                                                    | 19/43  | 0.74 (0.12 , 4.72)  |
| Mild sunburn that becomes a tan (referent)                                                                  | 41/93  | 1.00                |
| Tan with no sunburn                                                                                         | 35/49  | 1.90 (0.26 , 13.87) |
| No change in skin color                                                                                     | 6/16   | 0.28 (0.03 , 3.22)  |
| Hat or clothes use in the Summer                                                                            |        |                     |
| Never (referent)                                                                                            | 12/30  | 1.00                |
| Rarely                                                                                                      | 26/53  | 2.16 (0.49 , 9.51)  |
| Sometimes                                                                                                   | 29/40  | 2.55 (0.54 , 12.13) |
| Often                                                                                                       | 19/56  | 0.60 (0.14 , 2.58)  |

---

|               |        |                      |
|---------------|--------|----------------------|
| Always        | 20/39  | 1.11 (0.23 , 5.32)   |
| Parity number |        |                      |
| None          | 2/7    | 0.58 (0.04 , 8.41)   |
| 1 (referent)  | 14/37  | 1.00                 |
| 2             | 65/128 | 1.73 (0.53 , 5.63)   |
| 3 or more     | 25/42  | 2.93 (0.66 , 13.04)  |
| Centre        |        |                      |
| 1             | 17/79  | 1.00                 |
| 2             | 41/70  | 11.63 (2.96 , 45.74) |
| 3             | 49/70  | 3.99 (1.24 , 12.79)  |

---

<sup>a</sup> All the variables listed above were included in the logistic regression model; <sup>b</sup> Only past smoker was included because no one smoked at enrollment.
